# Supplementary material
Source: PubMed Central journal article supplement (PMC1859955)

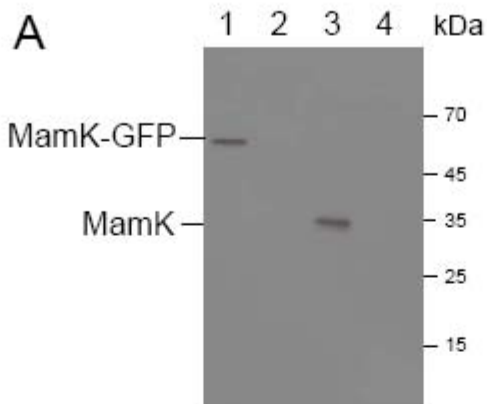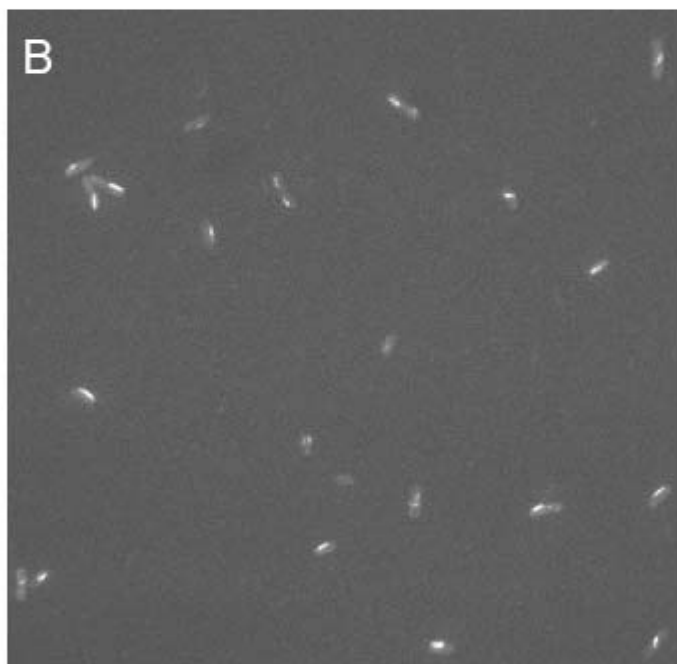

Supplement: pnas_0603760103_1.pdf [file pnas_0603760103_1.pdf]
